# Supplementary material for: An “off–on”-type electrochemiluminescent immunosensor based on resonance energy transfer and a liposome-assisted strategy for signal amplification
Source: Royal Society of Chemistry journal article supplement (doi:10.1039/d3nj00178d), 2023-01-01
Supplement: d3nj00178d1.pdf [file d3nj00178d1.pdf]

1 Electronic Supplementary Material (ESI) for New Journal of Chemistry.  
2 This journal is © The Royal Society of Chemistry and the Centre National de la  
3 Recherche Scientifique 2022

4

5 **An “off-on”-type Electrochemiluminescent Immunosensor based on**  
6 **Resonance Energy Transfer and Liposome-assisted Strategy for Signal**  
7 **Amplification**

8 Yu-Ling Wang<sup>a</sup>, Yi-Zhuo Fu<sup>a</sup>, Hui-Jin Xiao<sup>a</sup>, Pan Wu<sup>a</sup>, Shu-Wei Ren<sup>c</sup>, Jun-Tao Cao<sup>a,\*</sup>,  
9 and Yan-Ming Liu<sup>a,b,\*</sup>

10 <sup>a</sup>College of Chemistry and Chemical Engineering, Xinyang Key Laboratory of Functional  
11 Nanomaterials for Bioanalysis, Xinyang Normal University, Xinyang 464000, P. R. China

12 <sup>b</sup>College of Chemistry and Pharmaceutical Engineering, Huanghuai University, Zhumadian  
13 463000, China

14 <sup>c</sup>Xinyang Central Hospital, Xinyang 464000, P. R. China

15 \*Corresponding author: E-mail: jtcao11@163.com (J.-T. Cao) and liuym9518@sina.com (Y.-M.  
16 Liu), Tel & fax: +86-376-6392825.

17

18 **The calculation for amount of GSH per liposome**

19 The strong encapsulation ability of liposomes to achieve a large amount of GSH  
20 encapsulation, and finally play an important role in improving the ECL signal of the  
21 system. The TEM image of GSHLL (seen as Fig. 2A in the manuscript body) shows  
22 that the liposome has a uniform closed vesicle structure with a diameter of  
23 approximately 180 nm. Assuming the liposomes were homogeneous and unilamellar  
24 spheres, the characterizations of liposomes could be calculated by means of the  
25 following equations:

26 (1) The volume of liposome:

27 
$$V = (4/3) \pi R^3 = (4/3) \pi (90 \times 10^{-7})^3 \times 10^3 \mu\text{L} = 3.1 \times 10^{-12} \mu\text{L}$$

28 (2) The encapsulated volume of a single liposome:

29 
$$V = (4/3) \pi (R - T)^3 = (4/3) \pi [(90 - 4) \times 10^{-7}]^3 \times 10^3 \mu\text{L} = 2.7 \times 10^{-12} \mu\text{L}$$

1 (3) The average head group surface area per lipid molecule:

2 
$$A = A_1P_1 + A_2P_2 = 0.71 \times (1/2) + 0.19 \times (1/2) = 0.45 \text{ nm}^2$$

3 (4) The number of lipids per liposome:

4 
$$N_{\text{tot}} = 4\pi [R^2 + (R - T)^2]/A = 4\pi [90^2 + (90 - 4)^2]/0.45 = 4.3 \times 10^5$$

5 (5) The number of liposomes per L:

6 
$$N_{\text{lip}} = (M_{\text{lipid}} \times N_A)/N_{\text{tot}} = (40 \times 10^{-6} \times 6.02 \times 10^{23})/4.3 \times 10^5 = 5.6 \times 10^{13}$$

7 (6) Assuming that the GSH concentration inside the liposomes ( $M_{\text{lipid}}$ ) is identical to  
8 the original solution used, the amount of GSH per liposome was calculated as  
9 follows:

10 
$$N_{\text{GSH}} = (M_{\text{lipid}} \times N_A)/N_{\text{lipid}} = (0.1 \times 6.02 \times 10^{23})/5.6 \times 10^{13} = 1.1 \times 10^9$$

11 Where R is the diameter size of GOLL from TEM measurements, A is the average  
12 head group surface area per lipid, T is the bilayer thickness (4 nm). The components  
13 in the lipid composition are taken into account to theoretically calculate the average  
14 head group surface area per lipid (A).  $A_1$  and  $A_2$  are 0.71 nm and 0.19 nm<sup>2</sup> for ePC  
15 and cholesterol, respectively.  $P_1$  and  $P_2$  are the mole fractions of ePC, cholesterol,  
16 respectively, from the molar ratio of 1:1. The A obtained for these liposomes is 0.45  
17 nm<sup>2</sup> through using these values and weighting by the mole fraction of each  
18 component.  $N_{\text{tot}}$  is the number of lipids per liposome, and the  $N_{\text{lipid}}$  is the number of  
19 liposomes per L.  $M_{\text{lipid}}$  means the molar concentration of lipid.

20
